# Supplementary material for: Moving Beyond the Medication or Psychosocial Treatment Dichotomy to Address the Opioid Epidemic
Source: Atypon-hosted journal article supplement (doi:10.1176/appi.ps.202100627), 2022-05-25
Supplement: appi.ps.202100627.ds001.pdf [file appi.ps.202100627.ds001.pdf]

Online Supplement: Further Reading

1. Stimmel B: Drug abuse and social policy in America: the war that must be won. Binghamton, NY: Haworth Medical Press, 1996.
2. Volkow ND, Blanco C: Medications for opioid use disorders: clinical and pharmacological considerations. *J Clin Invest* 130:10-3, 2019.
3. Finlay AK, Harris AHS, Timko C, et al.: Disparities in access to medications for opioid use disorder in the Veterans Health Administration. *J Addict Med* 15:143-9, 2021.
4. Allen B, Nolan ML, Paone D: Underutilization of medications to treat opioid use disorder: what role does stigma play? *Subst Abus* 40:459-65, 2019.
5. McElrath K: Medication-assisted treatment for opioid addiction in the United States: critique and commentary. *Subst Use Misuse* 53:334-43, 2018.
6. American Public Health Association: An equitable response to the ongoing opioid crisis, 2021. Retrieved from: <https://apha.org/Policies-and-Advocacy/Public-Health-Policy-Statements/Policy-Database/2022/01/07/An-Equitable-Response-to-the-Ongoing-Opioid-Crisis>.
